# Supplementary material for: Gout, flares, and allopurinol use: a population-based study
Source: Springer Nature journal article supplement (doi:10.1186/s13075-019-1918-7), 2019-05-31
Supplement: MOESM1 [file 16763972]

SUPPLEMENTARY INFORMATION PROUDMAN *et al*

Table S1. Sociodemographic variables as predictors of gout. Analysis was performed by survey-weighted logistic regression, and coefficients represent log-odds ratios.

| Gout Predictor     | Coef.   | Std. Err. | t      | P>t     | -95% CI | +95% CI |
|--------------------|---------|-----------|--------|---------|---------|---------|
| Intercept          | -2.30   | 0.15      | -15.69 | < 0.001 | -2.59   | -2.01   |
| Sex (base = Male)  |         |           |        |         |         |         |
| <i>Female</i>      | -1.67   | 0.22      | -7.74  | < 0.001 | -2.09   | -1.24   |
| Age <sup>1</sup>   |         |           |        |         |         |         |
| <i>Linear</i>      | 5.E-02  | 1.E-02    | 5.15   | < 0.001 | 3.E-02  | 7.E-02  |
| <i>Quadratic</i>   | 1.E-04  | 4.E-04    | 0.29   | 0.771   | -6.E-04 | 9.E-04  |
| BMI <sup>2</sup>   |         |           |        |         |         |         |
| <i>Linear</i>      | 0.12    | 0.03      | 4.62   | < 0.001 | 0.07    | 0.18    |
| <i>Quadratic</i>   | -3.E-03 | 2.E-03    | -1.96  | 0.051   | -6.E-03 | 1.E-05  |
| IRSAD <sup>3</sup> |         |           |        |         |         |         |
| <i>Linear</i>      | -2.E-03 | 1.E-03    | -2.22  | 0.027   | -5.E-03 | -3.E-04 |
| <i>Quadratic</i>   | -1.E-05 | 6.E-06    | -1.96  | 0.050   | -2.E-05 | 6.E-09  |

<sup>1</sup>Age variable centred around 52

<sup>2</sup>BMI variable centred around 28

<sup>3</sup>IRSAD (SES) variable centred around 970

Table S2. Prevalence of Gout by gender, age and BMI

| Group                     | Gout Prevalence % (95% CI) |
|---------------------------|----------------------------|
| Gender:                   |                            |
| <i>Male</i>               | 10.5% (8.8, 12.5)          |
| <i>Female</i>             | 2.6% (1.9, 3.6)            |
| Age Group:                |                            |
| 25-34                     | 2.6% (1.3, 5.4)            |
| 35-44                     | 2.5% (1.2, 5.4)            |
| 45-54                     | 2.8% (1.6, 4.8)            |
| 55-64                     | 8.1% (5.6, 11.5)           |
| 65+                       | 13.4% (11.3, 15.8)         |
| BMI (WHO)                 |                            |
| <i>Normal/Underweight</i> | 2.9% (2.0, 4.2)            |
| <i>Overweight</i>         | 6.8% (5.3, 8.6)            |
| <i>Obese</i>              | 11.0% (8.7, 13.9)          |

Table S3. Prevalence of Gout % (95% CI) by Age x Gender

| Age   | Gender             |                 |
|-------|--------------------|-----------------|
|       | Male               | Female          |
| 25-34 | 4.9% (2.3, 10.4)   | 0.3% (0.0, 2.4) |
| 35-44 | 4.4% (1.8, 10.1)   | 0.7% (0.2, 2.6) |
| 45-54 | 4.7% (2.6, 8.3)    | 0.9% (0.2, 4.2) |
| 55-64 | 13.8% (9.4, 19.9)  | 2.7% (1.0, 7.3) |
| 65+   | 21.6% (17.7, 26.0) | 6.6% (4.8, 9.0) |

Table S4. Sociodemographic variables as predictors of allopurinol use (within gout participants). Analysis was performed by survey-weighted multinomial logistic regression, and coefficients represent log-odds ratios

| Allopurinol Predictor           | Coefficient | Std.Err | t     | P>t     | -95% CI | +95% CI |
|---------------------------------|-------------|---------|-------|---------|---------|---------|
| <b>NEVER USE (base outcome)</b> |             |         |       |         |         |         |
| <b>PRIOR USE</b>                |             |         |       |         |         |         |
| Intercept                       | -0.90       | 0.43    | -2.12 | 0.035   | -1.74   | -0.07   |
| Sex (base = Male)               |             |         |       |         |         |         |
| <i>Females</i>                  | -0.71       | 0.55    | -1.29 | 0.20    | -1.79   | 0.37    |
| Age <sup>3</sup>                |             |         |       |         |         |         |
| <i>Linear</i>                   | -3.E-02     | 2.E-02  | -1.35 | 0.18    | -6.E-02 | 1.E-02  |
| <i>Quadratic</i>                | 2.E-03      | 8.E-04  | 2.44  | 0.015   | 4.E-04  | 4.E-03  |
| BMI <sup>2</sup>                |             |         |       |         |         |         |
| <i>Linear</i>                   | 4.E-02      | 5.E-02  | 0.85  | 0.40    | -5.E-02 | 1.E-01  |
| <i>Quadratic</i>                | -2.E-03     | 3.E-03  | -0.75 | 0.45    | -7.E-03 | 3.E-03  |
| IRSAD <sup>3</sup>              |             |         |       |         |         |         |
| <i>Linear</i>                   | -3.E-03     | 3.E-03  | -1.00 | 0.32    | -8.E-03 | 3.E-03  |
| <i>Quadratic</i>                | 9.E-06      | 2.E-05  | 0.58  | 0.56    | -2.E-05 | 4.E-05  |
| <b>CURRENT USE</b>              |             |         |       |         |         |         |
| _cons                           | 0.24        | 0.39    | 0.62  | 0.54    | -0.53   | 1.01    |
| Sex (base = Male)               |             |         |       |         |         |         |
| <i>Females</i>                  | -2.28       | 0.51    | -4.48 | < 0.001 | -3.28   | -1.28   |
| Age <sup>1</sup>                |             |         |       |         |         |         |
| <i>Linear</i>                   | 7.E-03      | 2.E-02  | 0.32  | 0.75    | -4.E-02 | 5.E-02  |
| <i>Quadratic</i>                | 6.E-04      | 9.E-04  | 0.69  | 0.49    | -1.E-03 | 2.E-03  |
| BMI <sup>2</sup>                |             |         |       |         |         |         |
| <i>Linear</i>                   | 3.E-02      | 4.E-02  | 0.68  | 0.50    | -5.E-02 | 1.E-01  |
| <i>Quadratic</i>                | -2.E-03     | 3.E-03  | -0.83 | 0.41    | -7.E-03 | 3.E-03  |
| IRSAD <sup>3</sup>              |             |         |       |         |         |         |
| <i>Linear</i>                   | -7.E-04     | 3.E-03  | -0.28 | 0.78    | -6.E-03 | 4.E-03  |
| <i>Quadratic</i>                | -1.E-05     | 2.E-05  | -0.76 | 0.45    | -5.E-05 | 2.E-05  |

<sup>1</sup>Age variable centred around 52

<sup>2</sup>BMI variable centred around 28

<sup>3</sup>IRSAD (SES) variable centred around 970

Table S5. Sociodemographic variables and allopurinol use as predictors of the number of gout flares in the preceding year (within gout participants). Analysis was performed by survey-weighted multinomial logistic regression, and coefficients represent log-odds ratios

| Flares Predictor               | Coef    | Std.Eff | t     | P>t   | -95% CI  | +95% CI |
|--------------------------------|---------|---------|-------|-------|----------|---------|
| <b>FLARES = 0</b>              |         |         |       |       |          |         |
| (base outcome)                 |         |         |       |       |          |         |
| <b>FLARES = 1</b>              |         |         |       |       |          |         |
| Intercept                      | -0.49   | 0.50    | -0.98 | 0.33  | -1.48    | 0.49    |
| Allopurinol Use (Base = Never) |         |         |       |       |          |         |
| <i>Prior</i>                   | -0.61   | 0.68    | -0.89 | 0.37  | -1.94    | 0.73    |
| <i>Current</i>                 | -1.06   | 0.58    | -1.85 | 0.065 | -2.19    | 0.07    |
| Sex (base = Male)              |         |         |       |       |          |         |
| <i>Female</i>                  | 0.51    | 0.63    | 0.80  | 0.42  | -0.73    | 1.74    |
| Age <sup>1</sup>               |         |         |       |       |          |         |
| <i>Linear</i>                  | -0.048  | 0.021   | -2.28 | 0.023 | -0.089   | -0.007  |
| <i>Quadratic</i>               | -8.E-04 | 1.E-03  | -0.79 | 0.43  | -3.E-03  | 1.E-03  |
| BMI <sup>2</sup>               |         |         |       |       |          |         |
| <i>Linear</i>                  | 0.033   | 0.067   | 0.50  | 0.62  | -0.099   | 0.165   |
| <i>Quadratic</i>               | -8.E-04 | 3.E-03  | -0.25 | 0.80  | -7.E-03  | 5.E-03  |
| IRSAD <sup>3</sup>             |         |         |       |       |          |         |
| <i>Linear</i>                  | 3.E-03  | 4.E-03  | 0.76  | 0.45  | -4.E-03  | 1.E-02  |
| <i>Quadratic</i>               | 2.E-05  | 2.E-05  | 1.21  | 0.23  | -2.E-05  | 6.E-05  |
| <b>FLARES &gt;=2</b>           |         |         |       |       |          |         |
| Intercept                      | -1.22   | 0.52    | -2.32 | 0.02  | -2.24    | -0.19   |
| Allopurinol Use (base = Never) |         |         |       |       |          |         |
| <i>Prior</i>                   | -0.16   | 0.67    | -0.23 | 0.82  | -1.47    | 1.16    |
| <i>Current</i>                 | 0.89    | 0.51    | 1.72  | 0.085 | -0.12    | 1.90    |
| Sex (base = Male)              |         |         |       |       |          |         |
| <i>Female</i>                  | 1.09    | 0.52    | 2.08  | 0.038 | 0.058543 | 2.11363 |
| Age <sup>1</sup>               |         |         |       |       |          |         |
| <i>Linear</i>                  | -0.021  | 0.020   | -1.05 | 0.30  | -0.060   | 0.018   |
| <i>Quadratic</i>               | -5.E-04 | 8.E-04  | -0.63 | 0.53  | -2.E-03  | 1.E-03  |
| BMI <sup>2</sup>               |         |         |       |       |          |         |
| <i>Linear</i>                  | 0.18    | 0.06    | 2.92  | 0.004 | 0.06     | 0.30    |
| <i>Quadratic</i>               | -1.E-02 | 5.E-03  | -2.04 | 0.042 | -2.E-02  | -3.E-04 |
| IRSAD <sup>3</sup>             |         |         |       |       |          |         |
| <i>Linear</i>                  | 1.E-05  | 3.E-03  | 0.00  | 1.00  | -6.E-03  | 6.E-03  |
| <i>Quadratic</i>               | 5.E-06  | 1.E-05  | 0.31  | 0.76  | -2.E-05  | 3.E-05  |

<sup>1</sup>Age variable centred around 52

<sup>2</sup>BMI variable centred around 28

<sup>3</sup>IRSAD (SES) variable centred around 970
